# Supplementary material for: High temperature hybrid perovskite multifunctional switching materials constructed through precise molecular design
Source: Royal Society of Chemistry journal article supplement (doi:10.1039/d2qm00058j), 2022-01-01
Supplement: d2qm00058j3.pdf [file d2qm00058j3.pdf]

## Electronic Supplementary Information (ESI)

### High Temperature Hybrid Perovskite Multifunctional Switching Materials Constructed Through Precise Molecular Design

Yueyue He,<sup>a</sup> Zhuo Chen,<sup>a</sup> Xiaogang Chen,<sup>c</sup> Xian-Ming Zhang,<sup>a\*</sup> Dongying Fu<sup>a,b\*</sup>

---

*a* Institute of Crystalline Materials, Shanxi University, Taiyuan, 030006, China,

*b* State Key Laboratory of Quantum Optics and Quantum Optics Devices, Shanxi University,  
Taiyuan, 030006, China

*c* Ordered Matter Science Research Center, Nanchang University, Nanchang 330031, China

\*E-mail: dyfu@sxu.edu.cn (D. Fu), xmzhang@sxu.edu.cn (X.-M. Zhang)

## Table of Content

|                                                                             |      |
|-----------------------------------------------------------------------------|------|
| Powder X-Ray Diffraction Analysis and Thermogravimetric Analysis.....       | 2    |
| Pawley refinement of PXRD data of compound <b>2</b> at 483 K.....           | 2    |
| Variable-temperature<br>patterns.....                                       | 3    |
|                                                                             | PXRD |
| Ferroelastic domain variation of compound <b>1</b> .....                    | 3    |
| Ultraviolet-visible (UV-vis) Absorption Spectrum of compound <b>2</b> ..... | 3    |
| Stability test of compound <b>2</b> .....                                   | 4    |
| Crystal Data and Structure Refinement for compound <b>1</b> .....           | 4    |
| Crystal Data and Structure Refinement for compound <b>2</b> .....           | 5    |

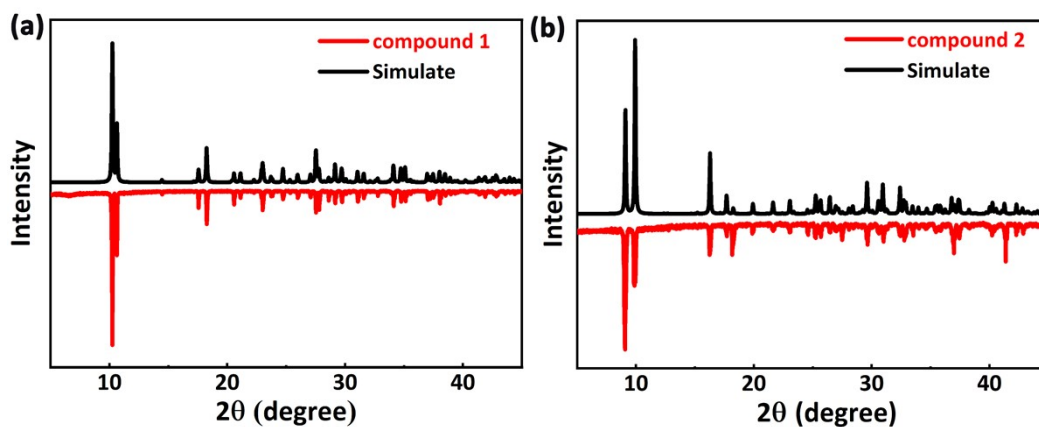

Fig. S1 Experimental and simulated powder x-ray diffractions patterns (PXRD) spectra of compound 1 and 2.

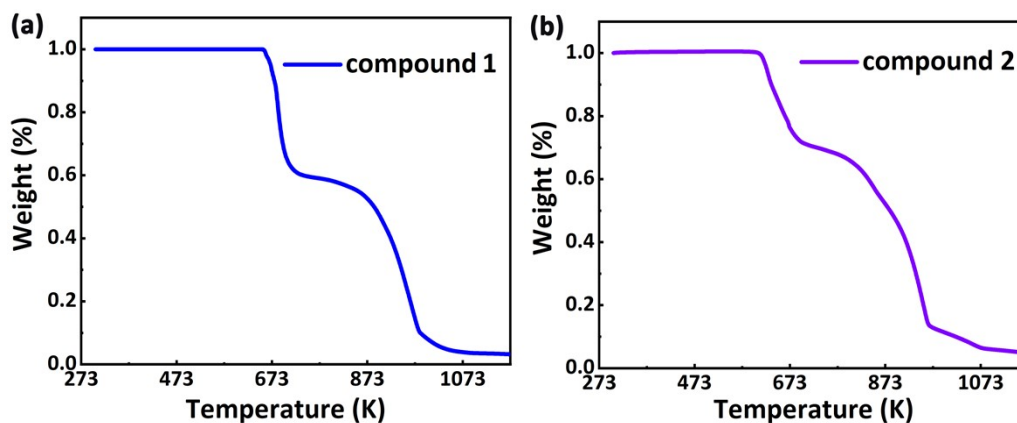

Fig. S2 The TGA of compound 1 (a) and compound 2 (b).

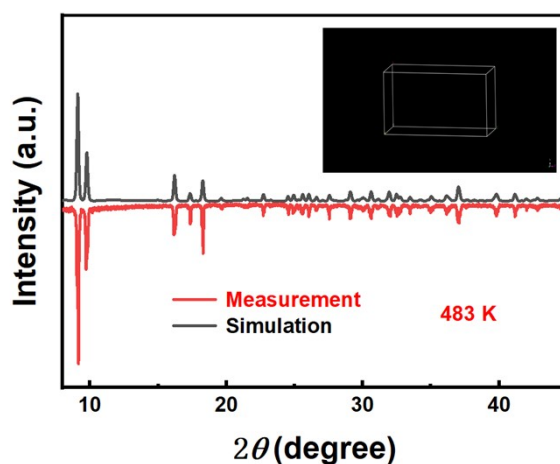

Fig. S3. Pawley refinement of PXRD data of compound 2 at 483 K with an orthorhombic unit cell.

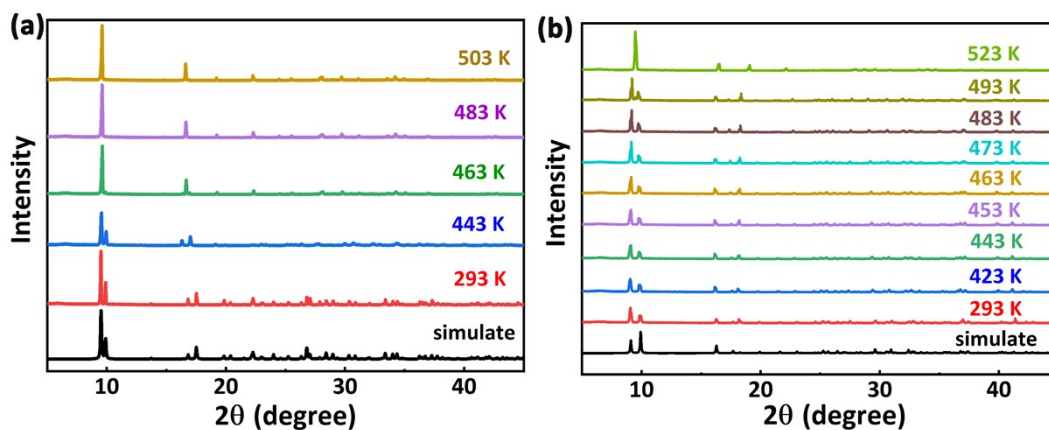

Fig. S4 Variable-temperature PXRD patterns of compound 1 (a) and compound 2 (b).

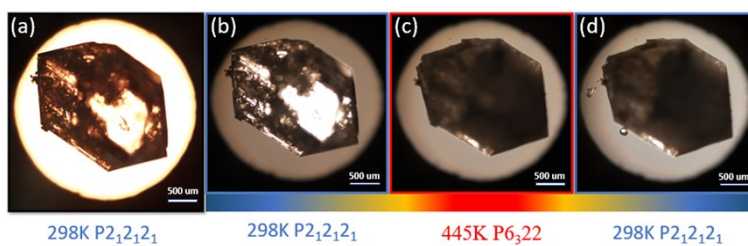

Fig. S5 Ferroelastic domain variation of 1 in the continuous heating and cooling process.

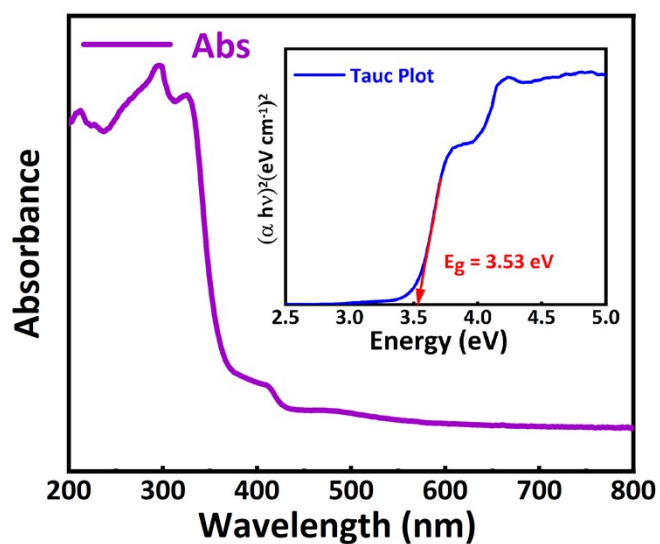

Fig. S6 Absorption spectra and optical bandgap calculated from corresponding Tauc plot of 2 (inset).

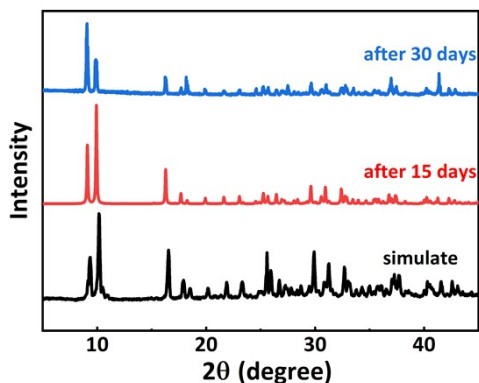

Fig. S7 Stability test of **2** at 45% humidity for 30 days.

|                                         |                                                              |                                                              |
|-----------------------------------------|--------------------------------------------------------------|--------------------------------------------------------------|
| $\alpha/^\circ$                         | 90                                                           | 90                                                           |
| $\beta/^\circ$                          | 90                                                           | 90                                                           |
| <b>Identification code</b>              | <b>10t</b>                                                   | <b>10t</b>                                                   |
| Volume/ $\text{\AA}^3$                  | 1499.14(10)                                                  | 790.9(5)                                                     |
| Empirical formula                       | $\text{C}_{91}\text{H}_{118}\text{Br}_3\text{NO}_6\text{Pb}$ | $\text{C}_{91}\text{H}_{118}\text{Br}_3\text{NO}_6\text{Pb}$ |
| Z                                       | 4                                                            | 2                                                            |
| Formula weight                          | 603.14                                                       | 603.14                                                       |
| $\rho_{\text{calc}}/\text{cm}^3$        | 3.752                                                        | 2.406                                                        |
| Temperature/K                           | 300 K                                                        | 463 K                                                        |
| Crystal system                          | orthorhombic                                                 | hexagonal                                                    |
| Index ranges                            | $-9 \leq h \leq 10, -12 \leq k \leq 12, -24 \leq l \leq 24$  | $-15 \leq h \leq 13, -10 \leq k \leq 13, -9 \leq l \leq 11$  |
| Reflections collected                   | 8772                                                         | 4354                                                         |
| Space group                             | $P2_12_12_1$                                                 | $P6_322$                                                     |
| Independent reflections                 | 3624 [Rint = 0.0308, Rsigma = 0.0382]                        | 746 [Rint = 0.0822, Rsigma = 0.0596]                         |
| a/ $\text{\AA}$                         | 8.6914(3)                                                    | 10.719(3)                                                    |
| b/ $\text{\AA}$                         | 10.0950(4)                                                   | 10.719(3)                                                    |
| c/ $\text{\AA}$                         | 16.6347(6)                                                   | 7.963(4)                                                     |
| Data/restraints/parameters              | 3627/0/146                                                   | 746/68/40                                                    |
| $\alpha/^\circ$                         | 90                                                           | 90                                                           |
| Goodness-of-fit on $F^2$                | 0.993                                                        | 1.062                                                        |
| Final R indexes [ $I \geq 2\sigma(I)$ ] | R1 = 0.0282, wR2 = 0.0608                                    | R1 = 0.0894, wR2 = 0.1907                                    |
| Volume/ $\text{\AA}^3$                  | 1459.52(9)                                                   | 792.3(6)                                                     |
| Final R indexes [all data]              | R1 = 0.0402, wR2 = 0.0636                                    | R1 = 0.2673, wR2 = 0.2561                                    |
| $\rho_{\text{calc}}/\text{cm}^3$        | 2.745                                                        | 2.326                                                        |
| Largest diff. peak/hole                 | 0.91/-1.49                                                   | 0.21/-0.40                                                   |
| Index ranges                            | $-11 \leq h \leq 9, -12 \leq k \leq 12, -20 < l < 18$        | $-11 \leq h \leq 9, -12 \leq k \leq 12, -20 < l < 18$        |
| Reflections collected                   | 8254                                                         | 3501                                                         |
| Independent reflections                 | 3449 [Rint = 0.0245, Rsigma = 0.0330]                        | 719 [Rint = 0.0770, Rsigma = 0.0628]                         |
| Data/restraints/parameters              | 3449/9/139                                                   | 719/103/48                                                   |
| Goodness-of-fit on $F^2$                | 1.062                                                        | 1.120                                                        |
| Final R indexes [ $I \geq 2\sigma(I)$ ] | R1 = 0.0333, wR2 = 0.0770                                    | R1 = 0.0532, wR2 = 0.1141                                    |
| Final R indexes [all data]              | R1 = 0.0410, wR2 = 0.0799                                    | R1 = 0.1993, wR2 = 0.1431                                    |

Table S1. Crystal Date and Structure Refinement for compound **1**.

Table S2. Crystal Data and Structure Refinement for compound **2**.
